# Supplementary material for: Cryptococcal Meningitis and Post-Infectious Inflammatory Response Syndrome in a Patient With X-Linked Hyper IgM Syndrome: A Case Report and Review of the Literature
Source: PubMed Central journal article supplement (PMC8320724; doi:10.3389/fimmu.2021.708837), 2021-07-15
Supplement: DataSheet_1.pdf [file DataSheet_1.pdf]

**Supplementary material**

**Figure 1. CD154 expression on resting and activated PBMC gated on CD3+ T cells**

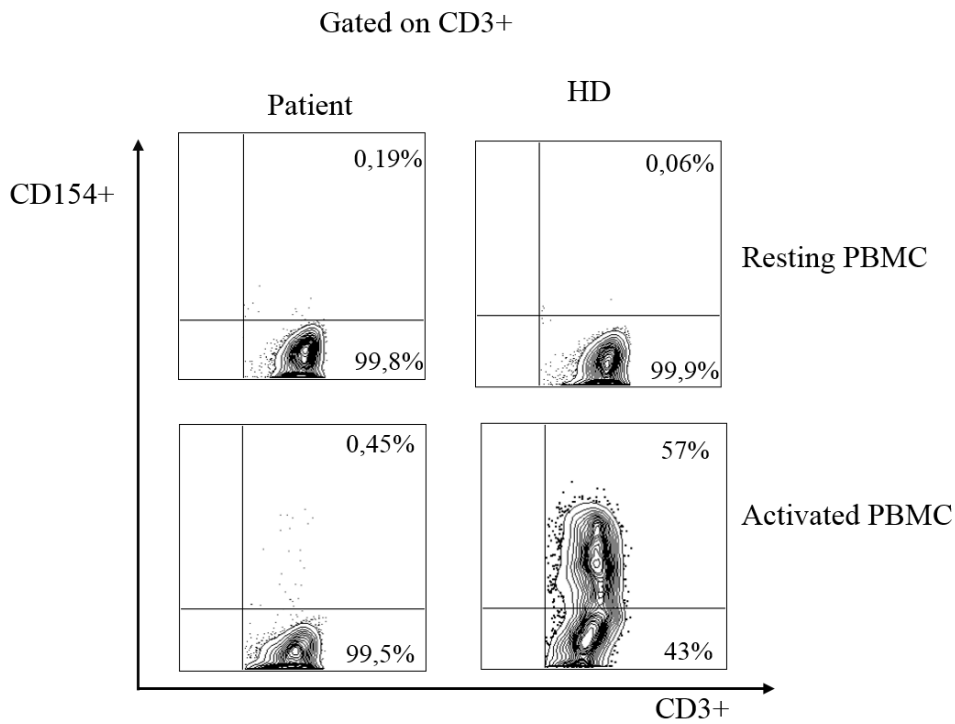

**Table 1. CSF features at three times points: at the admission, after high dose of steroid treatment and during the steroid tapering**

| CSF                               | Admission | After high dose of steroid treatment | During steroid tapering |
|-----------------------------------|-----------|--------------------------------------|-------------------------|
| <b>Glucose mg/dl</b>              | 35        | 64                                   | 45                      |
| <b>Total protein mg/dl</b>        | 84        | 61                                   | 45                      |
| <b>WBC mmc</b>                    | 78        | 18                                   | 3                       |
| <b>Cryptococcal antigen titre</b> | 1:100     | 1:1                                  | Positive, no titre      |

**Table 2** | Patient's immunological investigations at 20 years old

| <b>COMPLETE BLOOD COUNT</b>                      | Patient value | Normal age-matched value |
|--------------------------------------------------|---------------|--------------------------|
| Complete blood count                             |               |                          |
| White blood cell ( $10^3 /\mu\text{l}$ )         | 4.15          | 4.00–11.00               |
| Red blood cells ( $10^6/\mu\text{l}$ )           | 5.42          | 4.40–6.00                |
| Neutrophils ( $10^3 /\mu\text{l}$ )              | 1.10          | 1.60–7.70                |
| Lymphocytes ( $10^3 /\mu\text{l}$ )              | 2.47          | 0.80–4.73                |
| Platelets ( $10^3 /\mu\text{l}$ )                | 204           | 150–450                  |
| Hemoglobin (g/dl)                                | 14.9          | 13–17.50                 |
| <b>LYMPHOCYTES SUBSETS</b>                       | Patient value | Normal age-matched value |
| Absolute CD3+ ( $/\mu\text{l}$ )                 | 2129          | (2100–6200)              |
| Absolute CD4+ ( $/\mu\text{l}$ )                 | 617           | (608–1217)               |
| Absolute CD8+ ( $/\mu\text{l}$ )                 | 1259          | (228–577)                |
| Absolute CD19+ cells/mL ( $/\mu\text{l}$ )       | 222           | (119–578)                |
| Absolute CD16+CD56+ ( $/\mu\text{l}$ )           | 83            | (720.2600)               |
| <b>% on total lymphocytes (absolute value)</b>   |               |                          |
| CD3+ CD45+                                       | <b>86,2</b>   | 71 (62–81) §             |
| CD19+ CD45+                                      | 9,0           | 12 (6–21) §              |
| NK (CD3- CD16+CD56+ CD45+)                       | 3,4           | 16 (6–23) §              |
| CD3+ CD4+                                        | <b>25,5</b>   | 42 (31–53) §             |
| CD3+ CD8+                                        | <b>51</b>     | 26 (19–30) §             |
| <b>% on CD3+CD4+ T cells</b>                     |               |                          |
| CD3+CD4+CD27+CD45RA+ Naïve CD4+                  | 63,7          | 62.0 (49.4–71.9) °       |
| CD3+CD4+CD27+CD45RA- Central Memory              | 29,8          | 33.8 (24.3–42.7) °       |
| CD3+CD4+CD27-CD45RA- Effector Memory             | 6,0           | 3,2 (2,1–7,4) °          |
| CD3+CD4+CD31+CD45RA+ Effector Memory CD45RA+     | 0,44          | 0,3 (0,1–7,4) °          |
| CD3+CD4+CD31+CD45RA+ Recent Thymic Emigrants     | 59,2          | 42.8 (32.7–60.9) °       |
| CD4+CD45RO+CXCR5+ Peripheral T helper follicular | <b>0,7</b>    | 5,6 (3,1–9,1) #          |
| <b>% on CD3+CD8+ T cells</b>                     |               |                          |
| CD3+CD8+CCR7+CD45RA+ Naïve CD8+                  | 12,4          | 43 (18–61) §             |
| CD3+CD8+CCR7+CD45RA- Central Memory              | 0,63          | 6 (3–12) §               |
| CD3+CD8+CCR7-CD45RA- Effector Memory             | 68,4          | 39(25–58) §              |
| CD3+CD8+CCR7-CD45RA+ Effector Memory CD45RA+     | 18,6          | 12 (5–20) §              |
| <b>% on CD19+ B cells</b>                        |               |                          |
| CD27+IgD+IgM+ unswitched memory                  | <b>1,1</b>    | 6.4 (2.6–13.4) ^         |
| CD27+IgD-IgM- Switched memory                    | <b>0,45</b>   | 9.1 (4.0–21.2) ^         |
| CD27-IgD+IgM+ naïve B cells                      | <b>96,6</b>   | 79.6 (61.6–87.4) ^       |
| CD27-IgD-IgM- double Negative B cells            | <b>1,93</b>   | 4.9 (1.4–13.0) ^         |
| MEMORY CD19+CD27+ Total Memory B cells           | <b>1,4</b>    | 16.0 (7.0–29.0) ^        |

| LYMPHOCYTE STIMULATION TO MITOGENS (cpm) | Patient value           | Normal age-matched value |
|------------------------------------------|-------------------------|--------------------------|
| Phytohemagglutinin                       | >35.000                 | >35.000                  |
| SERUM IMMUNOGLOBULIN LEVELS              |                         |                          |
| IgG (mg/dL)                              | <b>783</b> <sup>∞</sup> | 700-1600                 |
| IgA (mg/dL)                              | <b>247</b>              | 70-400                   |
| IgM (mg/dL)                              | <b>126</b>              | 40-230                   |

<sup>^</sup> Duchamp, M., et al. (2014), B-cell subpopulations in children: National reference values. *Immunity, Inflammation and Disease*, 2: 131-140.

<sup>°</sup> van Gent R, et al. Refined characterization and reference values of the pediatric T- and B-cell compartments. *Clin Immunol*. 2009 Oct;133(1):95-107.

<sup>§</sup> Garcia-Prat M, et al. Extended immunophenotyping reference values in a healthy pediatric population. *Cytometry B Clin Cytom*. 2018 Oct 17.

<sup>∞</sup> On IVIG

# Internal laboratory reference values
